# Supplementary material for: Designing endocrine disruption out of the next generation of chemicals
Source: Royal Society of Chemistry journal article supplement (doi:10.1039/c2gc35055f), 2012-12-06
Supplement: c2gc35055f.pdf [file c2gc35055f.pdf]

**Table S1: Scientific Advisory Committee**

| <b>Member</b>              | <b>Affiliation</b>                                                                    | <b>Area of Expertise</b> |
|----------------------------|---------------------------------------------------------------------------------------|--------------------------|
| Bruce Blumberg, PhD        | University of California, Irvine                                                      | Endocrine Disruption     |
| Terrence Collins, PhD      | Carnegie Mellon University                                                            | Green Chemistry          |
| David Crews, PhD           | University of Texas at Austin                                                         | Endocrine Disruption     |
| Peter L. deFur, PhD        | Environmental Stewardship Concepts, LLC                                               | Endocrine disruption     |
| Andrea C. Gore, PhD        | University of Texas at Austin                                                         | Endocrine Disruption     |
| Lou Guillette, PhD         | Medical University of South Carolina                                                  | Endocrine Disruption     |
| Jerrold Heindel, PhD       | National Institute of Environmental Health Sciences                                   | Endocrine disruption     |
| John Peterson Myers, PhD   | Environmental Health Sciences                                                         | Endocrine disruption     |
| Kristina A. Thayer, PhD    | Center for the Evaluation of Risks to Human Reproduction, National Toxicology Program | Endocrine Disruption     |
| Frederick S. vom Saal, PhD | University of Missouri                                                                | Endocrine Disruption     |
| John Warner, PhD           | Warner Babcock Institute for Green Chemistry                                          | Green Chemistry          |
| Cheryl S. Watson, PhD      | University of Texas Medical Branch                                                    | Endocrine Disruption     |
| R. Thomas Zoeller, PhD     | University of Massachusetts, Amherst                                                  | Endocrine Disruption     |

**Table S2: Tools available for in-house computational-based assessments of EDC activity**

| Database                                                                                         | Website                                                                                       | Summary                                                                                                                                                                                                                                                                                                             |
|--------------------------------------------------------------------------------------------------|-----------------------------------------------------------------------------------------------|---------------------------------------------------------------------------------------------------------------------------------------------------------------------------------------------------------------------------------------------------------------------------------------------------------------------|
| FDA Endocrine Disruptor Knowledge Base (EDKB)                                                    | <a href="http://edkb.fda.gov/webstart/edkb/">http://edkb.fda.gov/webstart/edkb/</a>           | Approximately 3300 records for over 1800 EDCs from different assays. Data can be cross-linked to other publicly available databases including TOXNET                                                                                                                                                                |
| MOLE db                                                                                          | <a href="http://michem.distat.unimib.it/mole_db/">http://michem.distat.unimib.it/mole_db/</a> | Molecular Descriptors Database by Milano Chemometric and QSAR Research Group. The MOLE db is a free online database of molecular descriptors calculated for 243773 molecules.                                                                                                                                       |
| TOXNET                                                                                           | <a href="http://toxnet.nlm.nih.gov/">http://toxnet.nlm.nih.gov/</a>                           | Databases on toxicology, hazardous chemicals, environmental health, and toxic releases.                                                                                                                                                                                                                             |
| VEGA                                                                                             | <a href="http://www.vega-qsar.eu/">http://www.vega-qsar.eu/</a>                               | Free platform for QSAR modeling                                                                                                                                                                                                                                                                                     |
| CAESAR (Computer Assisted Evaluation of industrial chemical Substances According to Regulations) | <a href="http://www.caesar-project.eu/">http://www.caesar-project.eu/</a>                     | <b>CAESAR</b> was formed to develop QSAR models for REACH legislation. Five endpoints: <ul style="list-style-type: none"> <li>• bioconcentration factor</li> <li>• skin sensitization</li> <li>• carcinogenicity</li> <li>• mutagenicity</li> <li>• developmental toxicity</li> </ul>                               |
| VirtualToxLab                                                                                    | <a href="http://www.biograf.ch/">http://www.biograf.ch/</a>                                   | Tool for predicting the toxic potential (endocrine and metabolic disruption) of drugs, chemicals and natural products. It simulates and quantifies their interactions towards a series of proteins known to trigger adverse effects using automated, flexible docking combined with multi-dimensional QSAR (mQSAR). |
| 3D QSAR                                                                                          | <a href="http://www.3d-qsar.com">www.3d-qsar.com</a>                                          | 3D QSAR Models Database                                                                                                                                                                                                                                                                                             |
| Open3DQSAR                                                                                       | <a href="http://www.open3dqsar.org">www.open3dqsar.org</a>                                    | Open-source tool aimed at pharmacophore exploration by high-throughput chemometric analysis of                                                                                                                                                                                                                      |

|                                     |                                                                                                                                                                           |                                                                                                                                                                                                                                                  |
|-------------------------------------|---------------------------------------------------------------------------------------------------------------------------------------------------------------------------|--------------------------------------------------------------------------------------------------------------------------------------------------------------------------------------------------------------------------------------------------|
|                                     |                                                                                                                                                                           | molecular interaction fields (MIFs).                                                                                                                                                                                                             |
| EPA ACTor                           | <a href="http://actor.epa.gov/actor/">http://actor.epa.gov/actor/</a>                                                                                                     | ACTor aggregates data from over 500 public sources on over 500,000 environmental chemicals searchable by chemical name, other identifiers and by chemical structure.                                                                             |
| NTP CEBS                            | <a href="http://www.niehs.nih.gov/research/resources/databases/cebs/index.cfm">http://www.niehs.nih.gov/research/resources/databases/cebs/index.cfm</a>                   | The CEBS database houses data on chemical effects on biological systems that have been deposited by academic, industrial and governmental laboratories.                                                                                          |
| PubChem GeneGO                      | <a href="http://www.genego.com/">http://www.genego.com/</a>                                                                                                               | Data mining tools and databases help to capture and define the underlying biology behind different types of high-throughput experimental data and understand the effects of small molecule drug compounds in human tissues.                      |
| Comparative Toxicogenomics Database | <a href="http://ctdbase.org/">http://ctdbase.org/</a>                                                                                                                     | CTD includes curated data describing cross-species chemical-gene/protein interactions and chemical- and gene-disease associations to illuminate molecular mechanisms underlying variable susceptibility and environmentally influenced diseases. |
| Leadscope                           | <a href="http://www.leadscope.com/">http://www.leadscope.com/</a>                                                                                                         | Incorporates chemically based data mining, visualization and advanced informatics techniques.                                                                                                                                                    |
| OECD QSAR Toolbox                   | <a href="http://www.oecd.org/document/54/0,3746,en_2649_34379_42923638_1_1_1_1,00.html">http://www.oecd.org/document/54/0,3746,en_2649_34379_42923638_1_1_1_1,00.html</a> | A software application designed to fill in gaps in (eco)toxicity data needed for hazard assessment of chemicals.                                                                                                                                 |
| OpenTox                             | <a href="http://www.opentox.org/">http://www.opentox.org/</a>                                                                                                             | Tools for the integration of data from various sources to generate and validate computer models for toxic effects                                                                                                                                |

**Table S3: Receptors and other endpoints that can be assessed using Tier 2 high-throughput screening**

|                                                                                                                            |
|----------------------------------------------------------------------------------------------------------------------------|
| Androgen receptor                                                                                                          |
| Aryl hydrocarbon receptor                                                                                                  |
| Estrogen receptor alpha                                                                                                    |
| Estrogen receptor beta                                                                                                     |
| Farnesoid X receptor                                                                                                       |
| Glucagon receptor                                                                                                          |
| Glucocorticoid receptor (GR)                                                                                               |
| Liver X receptor $\beta$ (LXR $\beta$ )                                                                                    |
| Melanin-concentrating hormone receptor 1 (MCHR1)                                                                           |
| Membrane estrogen receptor (mER/GPR30)                                                                                     |
| Mineralocorticoid receptor                                                                                                 |
| Peroxisome proliferator-activated receptor $\alpha$ , $\delta$ , $\gamma$ (PPAR $\alpha$ , PPAR $\delta$ , PPAR $\gamma$ ) |
| Pregnane X receptor                                                                                                        |
| Prolactin receptor (PRLR)                                                                                                  |
| Prostaglandin agonism through EP1 receptor                                                                                 |
| Retinoic acid receptor (RAR)                                                                                               |
| Retinoid X receptor $\alpha$ (RXR $\alpha$ )                                                                               |
| Retinoid-related orphan receptor gamma (ROR $\gamma$ )                                                                     |
| Thyroid hormone receptor b (TRb)                                                                                           |
| Vasopressin V3 (V1B) Receptor                                                                                              |
| Vitamin D receptor (VDR)                                                                                                   |

**Table S4: Examples of current assays, biological endpoints, and references, available for Tier 3 screening**

| <b>Hypothalamic-Pituitary-Adrenal (Stress) Axis</b>       |                 |                                                                                                                  |                                                                                                                                                                                            |                     |
|-----------------------------------------------------------|-----------------|------------------------------------------------------------------------------------------------------------------|--------------------------------------------------------------------------------------------------------------------------------------------------------------------------------------------|---------------------|
| <b>Assay</b>                                              | <b>Receptor</b> | <b>Cell Type</b>                                                                                                 | <b>Endpoints</b>                                                                                                                                                                           | <b>Reference(s)</b> |
| Glucocorticoid responsive assay                           | GR              | Human breast cancer cells (MDA-MB-453) stably transfected with an MMTV.luciferase.neo reporter gene construct    | Activation of MMTV luciferase reporter occurs via treatment with glucocorticoids or androgen receptor agonists. Treatment with anti-androgens allows GR-agonists to be examined separately | [59]                |
| <b>Hypothalamic-Pituitary-Gonadal (Reproductive) Axis</b> |                 |                                                                                                                  |                                                                                                                                                                                            |                     |
| <b>Assay</b>                                              | <b>Receptor</b> | <b>Cell Type</b>                                                                                                 | <b>Endpoints</b>                                                                                                                                                                           | <b>Reference(s)</b> |
| A-screen                                                  | AR              | MCF-7 cells transfected with androgen receptor (MCF7-AR1)                                                        | Estrogen-induced cell proliferation is inhibited by androgens                                                                                                                              | [60]                |
| AR-CALUX                                                  | AR              | U2-OS human osteosarcoma transfected with luciferase reporter                                                    | Androgen receptor-mediated luciferase reporter gene-expression                                                                                                                             | [61]                |
| Aromatase induction                                       |                 | Human adrenocortical carcinoma (H295R)<br>Human placental choriocarcinoma (JEG-3)<br>Human breast cancer (MCF-7) | Aromatase activity as measured by conversion of androstenedione and induction of aromatase gene expression                                                                                 | [62]                |
| E-screen                                                  | ER              | Human breast cancer cell line MCF-7                                                                              | Cell proliferation                                                                                                                                                                         | [63-68]             |
| E2SULT                                                    |                 | Cell-free                                                                                                        | Inhibition of estrogen sulfotransferase                                                                                                                                                    | [69]                |
| ER-CALUX                                                  | ER              | T47D.Luc- human breast cancer cells transfected with luciferase reporter                                         | Estrogen receptor-mediated luciferase reporter gene-expression                                                                                                                             | [70]                |
| EstrArray                                                 | ER              | Human breast cancer cell line MCF-7                                                                              | Gene expression of estrogen-dependent genes                                                                                                                                                | [71]                |
| PR – transactivation /transcription assay                 | PR              | HEK 293T transfected with luciferase reporter                                                                    | PR-mediated luciferase reporter protein expression (luminescence)                                                                                                                          | [72]                |
| PR-CALUX                                                  | PR              | U2-OS human osteosarcoma                                                                                         | progesterone receptor-mediated                                                                                                                                                             | [73]                |

|                                                                              |                                                 | transfected with luciferase reporter                                                      | luciferase reporter gene-expression                                   |                     |
|------------------------------------------------------------------------------|-------------------------------------------------|-------------------------------------------------------------------------------------------|-----------------------------------------------------------------------|---------------------|
| Steroidogenesis                                                              |                                                 | Human adenocarcinoma cell line (H295R)                                                    | Interference with steroidogenesis-production of P4, T, and E2         | [74]                |
| YES, YAS, YPS, etc.                                                          | ER $\alpha$ , ER $\beta$ , AR, PR, GR, MR, AhR. | Yeast - <i>Saccharomyces cerevisiae</i>                                                   | Hormone-mediated $\beta$ -galactosidase reporter gene-expression      | [75, 76]            |
| <b>Hypothalamic-Pituitary-Thyroid Axis</b>                                   |                                                 |                                                                                           |                                                                       |                     |
| <b>Assay</b>                                                                 | <b>Receptor</b>                                 | <b>Cell Type</b>                                                                          | <b>Endpoints</b>                                                      | <b>Reference(s)</b> |
| Dendrite arborization                                                        | TR                                              | Primary Purkinje cells                                                                    | TH-dependent dendrite arborization of cerebellar Purkinje cells       | [77-79]             |
| Iodide Uptake                                                                | NIS                                             | NIS-transfected CHO or FRTL-5 cells                                                       | Inhibition of iodide uptake                                           | [80]; [81]          |
| Neurite extension                                                            | TR                                              | Rat granule cells primary culture                                                         | Granule cell neurite extension                                        | [82]                |
| T-screen aka GH3 Cell Assay                                                  | TR                                              | Rat pituitary tumor cell line GH3                                                         | Cell proliferation                                                    | [83], [84]          |
| TH-reporter assay                                                            | TR                                              | GH3 pituitary cells transfected with TRE-luciferase                                       | Thyroid hormone receptor-mediated luciferase reporter-gene expression | [85]                |
| TPO Inhibition                                                               | Thyroid Peroxidase                              | Cell-free                                                                                 | Inhibition of thyroperoxidase                                         | [86], [87]          |
| <b>Retinoid/Peroxisome Proliferator-Activated Receptor Signaling Pathway</b> |                                                 |                                                                                           |                                                                       |                     |
| <b>Assay</b>                                                                 | <b>Receptor</b>                                 | <b>Cell Type</b>                                                                          | <b>Endpoints</b>                                                      | <b>Reference(s)</b> |
| Adipocyte differentiation assay                                              | RXR/PPAR $\gamma$                               | Mouse fibroblasts (preadipocyte cell lines 3T3-L1 or C3H10T1/2)                           | Differentiation into adipocytes, accumulation of lipid droplets       | [88-91]             |
| AhR activation                                                               | AhR                                             | Human HepG2 hepatoma<br>Human MCF7<br>Mouse H1L1.1c2 hepatoma<br>Mouse MLEL1.1c1 hepatoma | Arylhydrocarbon receptor-mediated luciferase reporter gene-expression | [92]                |
| DR-CALUX                                                                     | AhR                                             | Rat hepatoma cell line (H4IIE) transfected with luciferase reporter                       | Arylhydrocarbon receptor-mediated luciferase reporter gene-expression | [93]                |
| PPAR Transactivation Reporter Assay                                          | PPAR                                            | Several cell lines are used for this commercially available assay                         | PPAR-mediated luciferase reporter gene expression                     | [94]                |
| Pregnane X Receptor Transactivation                                          | PXR                                             | Human hepatoma cell line HepG2                                                            | PXR-mediated induction of CYP3A4- luciferase                          | [95]                |

| Reporter Assay                                 |                 |                                               | reporter gene                                                              |                     |
|------------------------------------------------|-----------------|-----------------------------------------------|----------------------------------------------------------------------------|---------------------|
| RAR Transactivation Reporter Assay             | RAR             | COS-7 cells                                   | RAR-mediated luciferase reporter activity (luminescence)                   | [96]                |
| RXR Transactivation Reporter Assay             | RXR             | HEK 293T transfected with luciferase reporter | RXR-mediated luciferase reporter gene expression                           | [97, 98]            |
| <b>Non-genomic Actions of Steroid Mimetics</b> |                 |                                               |                                                                            |                     |
| <b>Assay</b>                                   | <b>Receptor</b> | <b>Cell Type</b>                              | <b>Endpoints</b>                                                           | <b>Reference(s)</b> |
| ERK activation (or other MAPKs)                | mER             | Pituitary cell line (GH3/B6/F10)              | Phosphorylation of ERK (or JNK or p38 kinases) – 96-well plate immunoassay | [99-101]            |
| ERK activation (or other MAPKs)                | mER             | Breast cancer (MCF-7)                         | Phosphorylation of ERK (or JNK or p38 kinases) – 96-well plate immunoassay | [102]               |
| ERK activation (or other MAPKs)                | mPR             | Human breast cancer cells MDA-MB-231          | Phosphorylation of ERK- detected by Western Blot                           | [103]               |
| Gai activation                                 | mER             | Pituitary cell line (GH3/B6/F10)              | GTP-bound (activated) Gai protein– 96-well plate immunoassay               | Watson, submitted   |
| G protein activation                           | mPR             | Human breast cancer cells MDA-MB-231          | GTP-bound (activated) protein, cAMP levels                                 | [104, 105]          |

**Table S5: Whole fish and amphibian assays**

| <b>Assay</b>                                            | <b>Fish species</b>        | <b>Endpoints</b>                                                                                                                                                                                                                     | <b>Reference(s)</b>           |
|---------------------------------------------------------|----------------------------|--------------------------------------------------------------------------------------------------------------------------------------------------------------------------------------------------------------------------------------|-------------------------------|
| <b>Corticosteroid secretion</b>                         | <i>Oncorhynchus mykiss</i> | Corticosteroid secretion in response to ACTH                                                                                                                                                                                         | [106]                         |
| <b>Rapid developmental toxicity HTS (in Tier 2)</b>     | Zebrafish                  | Morphological endpoints (edema, bent body axes, pigmentation anomalies, and organ malformations)                                                                                                                                     | [40, 107-111]                 |
| <b>Fish sex development test</b>                        | Fathead minnow             | Designed to detect (anti-) estrogenic and (anti-) androgenic effects. Animals are exposed to test chemical before the onset of sexual differentiation.                                                                               | [112]                         |
|                                                         | Medaka                     |                                                                                                                                                                                                                                      | [113]                         |
|                                                         | Zebrafish                  |                                                                                                                                                                                                                                      | [114]                         |
|                                                         |                            | Vitellogenin induction in males/inhibition in females.<br>Gonadal histopathology<br>Hormone levels<br>Sex ratio<br>Development of intersex                                                                                           |                               |
| <b>Fish Two Generation Assay</b>                        | Fathead minnow             | Whole body, serum, tissue T4 levels                                                                                                                                                                                                  | [115]                         |
|                                                         | Medaka                     |                                                                                                                                                                                                                                      |                               |
|                                                         | Zebrafish                  |                                                                                                                                                                                                                                      |                               |
| <b>Locomotion medium throughput assay (in Tier 2)</b>   | Zebrafish                  | Can identify subtle developmental abnormalities between the nervous and musculoskeletal systems                                                                                                                                      | [116]                         |
| <b>Sex specific behavior</b>                            | Zebrafish                  | Sex specific behaviors (aggressive: nipping, chasing, circling, avoiding, and reproductive: female association, spawning, chasing, and nipping)                                                                                      | [117]                         |
| <b>Short-term reproduction assay/ 21-day fish assay</b> | Fathead minnow             | Designed to detect (anti-) estrogenic and (anti-) androgenic effects. Mature male and female fish will be monitored during a 21-day chemical exposure; survival, reproductive behavior, and secondary sexual characteristics will be | [115], [118];<br>[119], [120] |
|                                                         | Medaka                     |                                                                                                                                                                                                                                      |                               |



|                                  |                                             |                                                                                                                                                                                                                                                                                                             |                     |
|----------------------------------|---------------------------------------------|-------------------------------------------------------------------------------------------------------------------------------------------------------------------------------------------------------------------------------------------------------------------------------------------------------------|---------------------|
|                                  |                                             | observed while fecundity and fertilization success will be monitored daily. At termination of the assay, measurements will be made of a number of endpoints reflective of the status of the reproductive endocrine system, including the GSI, gonadal histology, and plasma concentrations of vitellogenin. |                     |
| <b>Transgenic reporter lines</b> | Zebrafish                                   | Current lines can detect estrogenic activity and aromatase induction. More transgenic lines are being developed.                                                                                                                                                                                            | [41, 121, 122]      |
| <b>Assay</b>                     | <b>Amphibian species</b>                    | <b>Endpoints</b>                                                                                                                                                                                                                                                                                            | <b>Reference(s)</b> |
| <b>Corticosteroid secretion</b>  | <i>X. laevis</i><br><i>Rana catesbeiana</i> | Corticosteroid secretion in response to ACTH                                                                                                                                                                                                                                                                | [123]               |
| <b>SEXDAMAX</b>                  | <i>X. laevis</i>                            | Sexual differentiation                                                                                                                                                                                                                                                                                      | [124]               |
|                                  | <i>X. tropicalis</i>                        | Metamorphosis                                                                                                                                                                                                                                                                                               | [125]               |

**Table S6: Factors for consideration in fish EDC studies**

| <b>Species</b>  | <b>Family/<br/>Distribution</b>     | <b>Adult Size</b>        | <b>Generation<br/>Time</b> | <b>Sexually<br/>Dimorphic</b> | <b>Blood<br/>Collection</b> | <b>Clutch size</b>          | <b>Hatch time</b> |
|-----------------|-------------------------------------|--------------------------|----------------------------|-------------------------------|-----------------------------|-----------------------------|-------------------|
| Fathead minnow  | Cyprinidae/ North America           | 50 – 75mm<br>2 – 5 g     | 4 mos                      | Yes                           | Yes                         | 50 – 200<br>every 3<br>days | 4 – 5 days        |
| Japanese medaka | Adrianichthyidae/<br>Southeast Asia | 25 – 50mm<br>0.7 – 0.8 g | 2 – 3 mos                  | Yes                           | No                          | 10 – 30<br>daily            | 8 – 10 days       |
| Zebrafish       | Cyprinidae/ India<br>and Myanmar    | 40 – 50mm<br>1.5 g       | 2 – 3 mos                  | Very little                   | A few<br>microliters        | >150 every<br>5 – 10 days   | 2 – 3 days        |

**Table S7: Selecting species for amphibian assays**

| Species                   | Advantages                                                                                                                                                                                                                                                                                                                                                                                                                                                                                                            | Disadvantages                                                                                                                                                                                                                                                                                                                                                                                                                                                                                                                                    |
|---------------------------|-----------------------------------------------------------------------------------------------------------------------------------------------------------------------------------------------------------------------------------------------------------------------------------------------------------------------------------------------------------------------------------------------------------------------------------------------------------------------------------------------------------------------|--------------------------------------------------------------------------------------------------------------------------------------------------------------------------------------------------------------------------------------------------------------------------------------------------------------------------------------------------------------------------------------------------------------------------------------------------------------------------------------------------------------------------------------------------|
| <i>Xenopus laevis</i>     | <p>Well-established laboratory model, with available molecular and endocrinology tools.</p> <p>Individual females can breed once per month, year round, and husbandry techniques are well-established.</p> <p>It responds to thyroid hormone, estrogen, and androgens.</p> <p>Females have large clutch sizes (2000 eggs and higher in large adults) so fully replicated experiments can be conducted easily.</p> <p>Aquatic throughout its life cycle so embryos, larvae and adults can be treated by immersion.</p> | <p>Some aspects of <i>X. laevis</i> biology may not be reflective of the majority of amphibians. For example, its putative sex-determining gene (DMW) is apparently unique even in the genus.</p> <p>Larvae are not sex-reversed by androgens as in other species.</p> <p>Corticoids do not enhance larval development <i>in vivo</i> as in other species.</p> <p>Few amphibians are completely aquatic as adults.</p> <p>Generation time is about two years under ideal conditions, a long period for studies aimed at the full life cycle.</p> |
| <i>Hyperolius argus</i>   | <p>Breeds repeatedly in the laboratory.</p> <p>Clear external markers for androgen, estrogen, and thyroid hormone effects.</p> <p>A single female may produce eggs once every few weeks.</p> <p>Breeding is spontaneous (unlike <i>X. laevis</i>) and does not require hormonal manipulation of adults.</p>                                                                                                                                                                                                           | <p>Small clutch size (about 200).</p> <p>More complicated husbandry.</p>                                                                                                                                                                                                                                                                                                                                                                                                                                                                         |
| <i>Lithobates pipiens</i> | <p><i>L. pipiens</i> is a well-studied species in the lab and the field.</p> <p>Widespread distribution in the northern U.S. allows for study in the field, along with closely related species in the southern US, some of which have ranges into Central America.</p> <p>In the laboratory, the sex ratio is</p>                                                                                                                                                                                                     | <p>Although newly collected females will breed in the laboratory, it is difficult to get them to cycle and produce regularly.</p> <p>There are no clear androgen or estrogen-dependent external markers at metamorphosis.</p>                                                                                                                                                                                                                                                                                                                    |

|  |                                      |  |
|--|--------------------------------------|--|
|  | affected by androgens and estrogens. |  |
|--|--------------------------------------|--|

**Table S8: Examples of current assays, biological endpoints, and references, available for Tier 5 screening**

| Assay                        | Cell Type / Animal Model    | Endpoints                                                                                                                                                                                                                                                                                                                                                                                                                                                                                  | Reference(s) |
|------------------------------|-----------------------------|--------------------------------------------------------------------------------------------------------------------------------------------------------------------------------------------------------------------------------------------------------------------------------------------------------------------------------------------------------------------------------------------------------------------------------------------------------------------------------------------|--------------|
| Asthma                       | Mouse                       | Pups (17 days old) are tested for functional markers of asthma: ELISA for IgE antibodies, eosinophilic inflammation (by lavage) and airway hyper-responsiveness by whole-body barometric plethysmography. Pregnant females are exposed to xenoestrogens in their drinking water. Pups (17 days old) are tested for functional markers for asthma: ELISA for IgE antibodies, eosinophilic inflammation (by lavage) and airway hyperresponsiveness by whole-body barometric plethysmography. | [126]        |
| Bone development assay       | Mouse                       | Fetuses are examined at embryonic day 17 and calcification of the bones is determined by alcian blue/alizarin red incorporation                                                                                                                                                                                                                                                                                                                                                            | [127]        |
| Brain sexual dimorphism      | Mouse / Rat                 | Several regions of the brain are known to have sex-differences in the number and/or localization of specific populations of neurons (i.e. GABAergic cells, Tyrosine Hydroxylase-positive cells, etc.) Immunohistochemistry, in situ hybridization and/or RT-PCR analysis is used to measure these differences in specific brain nuclei.                                                                                                                                                    | [128-130]    |
| Forced Breeding Assay        | Mouse                       | Females are paired with control males (proven breeders) and 1) the time to mating is determined; 2) the number of pups delivered is determined.                                                                                                                                                                                                                                                                                                                                            | [131, 132]   |
| Kidney function assay        | Rat                         | Blood urea nitrogen concentrations are measured using standard diagnostic kits. Levels of Malondialdehyde (a measure of lipid peroxidation) and Glutathione (an antioxidant) are measured in kidney extracts.                                                                                                                                                                                                                                                                              | [133, 134]   |
| Mammary gland carcinogenesis | Rat                         | Thin sections of mammary tissues are examined for neoplastic lesions (hyperplasias and DCIS) in animals with and without exposures to sub-effective doses of chemical carcinogens.                                                                                                                                                                                                                                                                                                         | [135-138]    |
| Mammary gland                | Mouse – puberty & adulthood | Morphological characteristics of                                                                                                                                                                                                                                                                                                                                                                                                                                                           | [64-66]      |

|                                   |             |                                                                                                                                                                                                                                                                                                                                                                                                                                                                                   |            |
|-----------------------------------|-------------|-----------------------------------------------------------------------------------------------------------------------------------------------------------------------------------------------------------------------------------------------------------------------------------------------------------------------------------------------------------------------------------------------------------------------------------------------------------------------------------|------------|
| development                       |             | whole mount mammary glands. In pubertal animals, the number and density of TEBs (proliferative structures) and size of the tree are easily assessed. In adult animals, the density of epithelial structures (alveolar buds & terminal ends) are calculated using a grid superimposed on whole mounts.                                                                                                                                                                             |            |
| Maternal behavior assay           | Mouse       | Between birth and weaning, dams are assessed at several discrete periods to determine time spent with/away from, nursing, and licking/grooming the pups. Additional tests can include the time it takes dams to retrieve pups that are moved by an experimenter out of the nest.                                                                                                                                                                                                  | [139]      |
| Obesity/metabolic syndrome assays | Mouse / Rat | <ol style="list-style-type: none"> <li>1) Body weight is monitored over several months.</li> <li>2) Fat deposition is determined with CT-scan (live) and fat pad dissection (at time of death)</li> <li>3) Fasting glucose/insulin levels are measured. Glucose and insulin tolerance tests are also performed.</li> <li>4) Food consumption and activity tests.</li> <li>5) RT-PCR analysis of brown and white fat.</li> </ol>                                                   | [140, 141] |
| Prostate carcinogenesis           | Rat         | Adult animals are treated with a cocktail of estrogen & testosterone and the incidence of PIN lesions are determined from thin sections. This should be coupled with immunohistochemical analysis to quantify changes in specific cell types.                                                                                                                                                                                                                                     | [142, 143] |
| Senescence (aging) assay          | Mouse / Rat | <ol style="list-style-type: none"> <li>1) Mice/rats are kept until later adulthood (9-12 months) and then mated to determine whether their reproductive axis is still capable of responding. This can be done in males and females.</li> <li>2) Examination of methylation patterns in tissues where epigenetic changes are associated with aging (i.e. brain)</li> <li>3) Estrous cyclicity is observed throughout adulthood for changing patterns from normal cycles</li> </ol> | [54-56]    |
| Sexually dimorphic                | Mouse / Rat | A number of behaviors are different between males and females                                                                                                                                                                                                                                                                                                                                                                                                                     | [144-147]  |

|                              |             |                                                                                                                                                                                                                                                                                                                                                                                                                                 |           |
|------------------------------|-------------|---------------------------------------------------------------------------------------------------------------------------------------------------------------------------------------------------------------------------------------------------------------------------------------------------------------------------------------------------------------------------------------------------------------------------------|-----------|
| behavior assays              |             | including play behaviors, anxiety, exploratory behaviors, and other social interactions. These assays determine whether the normal sex-specific behaviors are retained. These tests can also be performed in castrated males, ovariectomized females, and adrenalectomized males & females to determine whether replacement with controlled levels of hormone can normalize abnormal behaviors.                                 |           |
| Tissue gene expression assay | Mouse / Rat | Hormone-sensitive genes have been identified for several tissues in rodents as well as other species. Simple RT-PCR analysis allows expression of these genes to be compared between exposed/unexposed individuals. Micro-array technology is also available for more widespread screening of a multitude of genes. Finally, epigenetic changes can be assessed for single genes of interest by examining methylation patterns. | [148-150] |





**Table S9: Use of TiPED to detect endocrine disrupting activity of known EDCs**

|               | <b>Assay</b>                                        | BPA                              | Atrazine | Perfluorinated compounds | Phthalates | Organotins | Perchlorate |
|---------------|-----------------------------------------------------|----------------------------------|----------|--------------------------|------------|------------|-------------|
| <b>Tier 1</b> |                                                     |                                  |          |                          |            |            |             |
|               | Chemical reactivity                                 |                                  |          |                          |            |            |             |
|               | Physiochemical properties                           |                                  |          |                          | [151]      |            |             |
|               | Docking modeling                                    | [152]                            |          |                          | [153]      | [154]      |             |
|               | QSAR                                                | [155]                            |          |                          |            | [156]      |             |
| <b>Tier 2</b> |                                                     |                                  |          |                          |            |            |             |
|               | Tox21 qHTS                                          | [157]                            | [157]    |                          | [157]      |            |             |
| <b>Tier 3</b> |                                                     |                                  |          |                          |            |            |             |
|               | MCF7 cell proliferation assay                       | [158]                            |          | [159]                    | [160]      |            |             |
|               | Prostate cancer cell proliferation assay, PSA assay | [161]                            |          |                          |            | [162]      |             |
|               | 3T3-L1 adipogenesis assay                           | [163]                            |          |                          | [163]      | [89]       |             |
|               | GH3 T-screen assay                                  | [164]                            |          |                          | [165]      |            |             |
| <b>Tier 4</b> |                                                     |                                  |          |                          |            |            |             |
|               | Zebrafish rapid developmental toxicity HTS          | [107, 108]                       | [109]    | [110, 111]               |            | [40]       |             |
|               | Aquatic EDC reporter assays                         | [42, 166, 167] (ER)<br>[43] (TH) |          |                          |            |            |             |

|        |                                               |            |       |            |       |       |       |
|--------|-----------------------------------------------|------------|-------|------------|-------|-------|-------|
|        | Medaka and fathead minnow reproductive assays | [168]      | [169] | [170]      | [171] | [172] |       |
|        | Xenopus metamorphosis assay                   | [173]      |       |            | [174] |       | [175] |
|        | Xenopus sexual dimorphism assays              | [176]      | [177] |            | [178] |       | [179] |
|        | Frog metamorphosis assay                      | [173]      |       |            | [174] |       | [175] |
|        | <i>H. argus</i> color change assay            |            |       |            |       |       |       |
|        | Xenopus corticoid assay                       |            | [51]  |            |       |       |       |
| Tier 5 |                                               |            |       |            |       |       |       |
|        | Asthma assay                                  | [180]      |       |            |       |       |       |
|        | Brain sexual dimorphism assay                 | [129]      |       |            | [181] | [182] |       |
|        | Mammary carcinogenesis assay                  | [138]      | [183] |            |       |       |       |
|        | Mammary gland morphology assay                | [64]       | [184] | [185, 186] | [187] |       |       |
|        | Maternal behavior assay                       | [139]      |       |            |       | [188] |       |
|        | Obesity / Metabolic syndrome assays           | [189, 190] | [191] |            | [192] | [89]  |       |
|        | Prostate carcinogenesis assay                 | [193]      |       |            |       |       |       |

|  |                                   |       |       |       |       |       |       |
|--|-----------------------------------|-------|-------|-------|-------|-------|-------|
|  | Sexual dimorphism behavior assays | [129] |       |       |       |       |       |
|  | Tissue gene expression assay      | [194] | [195] | [196] | [197] | [198] | [199] |

59. Wilson, V.S., et al., *A novel cell line, MDA-kb2, that stably expresses an androgen- and glucocorticoid-responsive reporter for the detection of hormone receptor agonists and antagonists.* Toxicol Sci, 2002. **66**(1): p. 69-81.
60. Szelei, J., et al., *Androgen-induced inhibition of proliferation in human breast cancer MCF7 cells transfected with androgen receptor.* Endocrinology, 1997. **138**(4): p. 1406-12.
61. Sonneveld, E., et al., *Development of androgen- and estrogen-responsive bioassays, members of a panel of human cell line-based highly selective steroid-responsive bioassays.* Toxicol Sci, 2005. **83**(1): p. 136-48.
62. Sanderson, J.T., et al., *Effects of chloro-s-triazine herbicides and metabolites on aromatase activity in various human cell lines and on vitellogenin production in male carp hepatocytes.* Environ Health Perspect, 2001. **109**(10): p. 1027-31.
63. Villalobos, M., et al., *The E-screen assay: a comparison of different MCF7 cell stocks.* Environ Health Perspect, 1995. **103**(9): p. 844-50.
64. Vandenberg, L.N., et al., *Perinatal exposure to the xenoestrogen bisphenol-A induces mammary intraductal hyperplasias in adult CD-1 mice.* Reprod Toxicol, 2008. **26**: p. 210-9.
65. Markey, C.M., et al., *In utero exposure to bisphenol A alters the development and tissue organization of the mouse mammary gland.* Biology of Reproduction, 2001. **65**(4): p. 1215-23.
66. Vandenberg, L.N., et al., *The mammary gland response to estradiol: monotonic at the cellular level, non-monotonic at the tissue-level of organization?* Journal of Steroid Biochemistry and Molecular Biology, 2006. **101**(4-5): p. 263-74.
67. Soto, A.M., K.L. Chung, and C. Sonnenschein, *The pesticides endosulfan, toxaphene, and dieldrin have estrogenic effects on human estrogen-sensitive cells.* Environ Health Perspect, 1994. **102**(4): p. 380-3.
68. Soto, A.M., et al., *The E-SCREEN assay as a tool to identify estrogens: an update on estrogenic environmental pollutants.* Environ Health Perspect, 1995. **103**(Suppl 7): p. 113-22.
69. Kester, M.H., et al., *Potent inhibition of estrogen sulfotransferase by hydroxylated PCB metabolites: a novel pathway explaining the estrogenic activity of PCBs.* Endocrinology, 2000. **141**(5): p. 1897-900.
70. Legler, J., et al., *Development of a stably transfected estrogen receptor-mediated luciferase reporter gene assay in the human T47D breast cancer cell line.* Toxicol Sci, 1999. **48**(1): p. 55-66.
71. Terasaka, S., et al., *Using a customized DNA microarray for expression profiling of the estrogen-responsive genes to evaluate estrogen activity among natural estrogens and industrial chemicals.* Environ Health Perspect, 2004. **112**(7): p. 773-81.
72. Hanna, R.N., et al., *Characterization and expression of the nuclear progesterin receptor in zebrafish gonads and brain.* Biol Reprod, 2010. **82**(1): p. 112-22.
73. Schreurs, R.H., et al., *Interaction of polycyclic musks and UV filters with the estrogen receptor (ER), androgen receptor (AR), and progesterone receptor (PR) in reporter gene bioassays.* Toxicol Sci, 2005. **83**(2): p. 264-72.
74. Hecker, M., et al., *Human adrenocarcinoma (H295R) cells for rapid in vitro determination of effects on steroidogenesis: hormone production.* Toxicol Appl Pharmacol, 2006. **217**(1): p. 114-24.
75. Miller, C.A., 3rd, et al., *Single plasmids expressing human steroid hormone receptors and a reporter gene for use in yeast signaling assays.* Plasmid, 2010. **63**(2): p. 73-8.
76. Miller, C.A., 3rd, *A human aryl hydrocarbon receptor signaling pathway constructed in yeast displays additive responses to ligand mixtures.* Toxicol Appl Pharmacol, 1999. **160**(3): p. 297-303.
77. Kimura-Kuroda, J., I. Nagata, and Y. Kuroda, *Hydroxylated metabolites of polychlorinated biphenyls inhibit thyroid-hormone-dependent extension of cerebellar Purkinje cell dendrites.* Brain Res Dev Brain Res, 2005. **154**(2): p. 259-63.
78. Kimura-Kuroda, J., I. Nagata, and Y. Kuroda, *Hormonal disruption in cerebellar development by hydroxylated polychlorinated biphenyls.* Cerebellum, 2008. **7**(3): p. 500-1.
79. Kimura-Kuroda, J., I. Nagata, and Y. Kuroda, *Disrupting effects of hydroxy-polychlorinated biphenyl (PCB) congeners on neuronal development of cerebellar Purkinje cells: a possible causal factor for developmental brain disorders?* Chemosphere, 2007. **67**(9): p. S412-20.
80. Tonacchera, M., et al., *Relative potencies and additivity of perchlorate, thiocyanate, nitrate, and iodide on the inhibition of radioactive iodide uptake by the human sodium iodide symporter.* Thyroid, 2004. **14**(12): p. 1012-9.
81. Tran, N., et al., *Thyroid-stimulating hormone increases active transport of perchlorate into thyroid cells.* Am J Physiol Endocrinol Metab, 2008. **294**(4): p. E802-6.
82. Ibhazehiebo, K., et al., *Suppression of thyroid hormone receptor-mediated transcription and disruption of thyroid hormone-induced cerebellar morphogenesis by the polybrominated biphenyl mixture, BP-6.* Neurotoxicology, 2011. **32**(4): p. 400-9.

83. Gutleb, A.C., et al., *T-Screen as a tool to identify thyroid hormone receptor active compounds*. Environ Toxicol Pharmacol, 2005. **19**(2): p. 231-8.
84. Schriks, M., et al., *T-screen to quantify functional potentiating, antagonistic and thyroid hormone-like activities of poly halogenated aromatic hydrocarbons (PHAHs)*. Toxicol in Vitro, 2006. **20**(4): p. 490-8.
85. Freitas, J., et al., *Detection of thyroid hormone receptor disruptors by a novel stable in vitro reporter gene assay*. Toxicol in Vitro, 2011. **25**(1): p. 257-66.
86. Doerge, D.R. and H.C. Chang, *Inactivation of thyroid peroxidase by soy isoflavones, in vitro and in vivo*. J Chromatogr B Analyt Technol Biomed Life Sci, 2002. **777**(1-2): p. 269-79.
87. Doerge, D.R. and D.M. Sheehan, *Goitrogenic and estrogenic activity of soy isoflavones*. Environ Health Perspect, 2002. **110 Suppl 3**: p. 349-53.
88. Feige, J.N., et al., *The endocrine disruptor monoethyl-hexyl-phthalate is a selective peroxisome proliferator-activated receptor gamma modulator that promotes adipogenesis*. Journal of Biological Chemistry, 2007. **282**(26): p. 19152-66.
89. Grun, F., et al., *Endocrine-disrupting organotin compounds are potent inducers of adipogenesis in vertebrates*. Mol Endocrinol, 2006. **20**(9): p. 2141-55.
90. Kanayama, T., et al., *Organotin compounds promote adipocyte differentiation as agonists of the peroxisome proliferator-activated receptor gamma/retinoid X receptor pathway*. Mol Pharmacol, 2005. **67**(3): p. 766-74.
91. Li, X., J. Ycaza, and B. Blumberg, *The environmental obesogen tributyltin chloride acts via peroxisome proliferator activated receptor gamma to induce adipogenesis in murine 3T3-L1 preadipocytes*. Steroid Biochem Mol Biol, 2011. **127**(1-2): p. 9-15.
92. Garrison, P.M., et al., *Species-specific recombinant cell lines as bioassay systems for the detection of 2,3,7,8-tetrachlorodibenzo-p-dioxin-like chemicals*. Fundam Appl Toxicol, 1996. **30**(2): p. 194-203.
93. Murk, A.J., et al., *Chemical-activated luciferase gene expression (CALUX): a novel in vitro bioassay for Ah receptor active compounds in sediments and pore water*. Fundam Appl Toxicol, 1996. **33**(1): p. 149-60.
94. Colliar, L., A. Sturm, and M.J. Leaver, *Tributyltin is a potent inhibitor of piscine peroxisome proliferator-activated receptor alpha and beta*. Comp Biochem Physiol C Toxicol Pharmacol, 2011. **153**(1): p. 168-173.
95. Kumagai, T., et al., *Polycyclic aromatic hydrocarbons activate CYP3A4 gene transcription through human pregnane X receptor*. Drug Metab Pharmacokinet, 2011.
96. Idres, N., et al., *Activation of retinoic acid receptor-dependent transcription by all-trans-retinoic acid metabolites and isomers*. J Biol Chem, 2002. **277**(35): p. 31491-8.
97. Li, J., M. Ma, and Z. Wang, *A two-hybrid yeast assay to quantify the effects of xenobiotics on retinoid X receptor-mediated gene expression*. Toxicol Lett, 2008. **176**(3): p. 198-206.
98. Schoff, P.K. and G.T. Ankley, *Effects of methoprene, its metabolites, and breakdown products on retinoid-activated pathways in transfected cell lines*. Environ Toxicol Chem, 2004. **23**(5): p. 1305-10.
99. Jeng, Y.J., M. Kochukov, and C.S. Watson, *Combinations of physiologic estrogens with xenoestrogens alter calcium and kinase responses, prolactin release, and membrane estrogen receptor trafficking in rat pituitary cells*. Environ Health, 2010. **9**: p. 61.
100. Bulayeva, N.N. and C.S. Watson, *Xenoestrogen-induced ERK-1 and ERK-2 activation via multiple membrane-initiated signaling pathways*. Environ Health Perspect, 2004. **112**(15): p. 1481-7.
101. Jeng, Y.J. and C.S. Watson, *Combinations of physiologic estrogens with xenoestrogens alter ERK phosphorylation profiles in rat pituitary cells*. Environ Health Perspect, 2011. **119**(1): p. 104-12.
102. Zivadinovic, D. and C.S. Watson, *Membrane estrogen receptor-alpha levels predict estrogen-induced ERK1/2 activation in MCF-7 cells*. Breast Cancer Res, 2005. **7**(1): p. R130-44.
103. Kelder, J., et al., *Comparison between steroid binding to membrane progesterone receptor alpha (mPRalpha) and to nuclear progesterone receptor: correlation with physicochemical properties assessed by comparative molecular field analysis and identification of mPRalpha-specific agonists*. Steroids, 2010. **75**(4-5): p. 314-22.
104. Thomas, P., et al., *Steroid and G protein binding characteristics of the seatrout and human progestin membrane receptor alpha subtypes and their evolutionary origins*. Endocrinology, 2007. **148**(2): p. 705-18.
105. Pang, Y. and P. Thomas, *Progesterone signals through membrane progesterone receptors (mPRs) in MDA-MB-468 and mPR-transfected MDA-MB-231 breast cancer cells which lack full-length and N-terminally truncated isoforms of the nuclear progesterone receptor*. Steroids, 2011. **76**(9): p. 921-8.
106. Hontela, A., V.S. Leblond, and J.P. Chang, *Purification and isolation of corticosteroidogenic cells from head kidney of rainbow trout (Oncorhynchus mykiss) for testing cell-specific effects of a pesticide*. Comp Biochem Physiol C Toxicol Pharmacol, 2008. **147**(1): p. 52-60.

107. McCormick, J.M., et al., *Microbially mediated O-methylation of bisphenol A results in metabolites with increased toxicity to the developing zebrafish (Danio rerio) embryo*. Environ Sci Technol, 2011. **45**(15): p. 6567-74.
108. Truong, L., et al., *Persistent adult zebrafish behavioral deficits results from acute embryonic exposure to gold nanoparticles*. Comp Biochem Physiol C Toxicol Pharmacol, 2011.
109. Gorge, G. and R. Nagel, *Toxicity of lindane, atrazine, and deltamethrin to early life stages of zebrafish (Brachydanio rerio)*. Ecotoxicol Environ Saf, 1990. **20**(3): p. 246-55.
110. Shi, X., et al., *Developmental toxicity and alteration of gene expression in zebrafish embryos exposed to PFOS*. Toxicol Appl Pharmacol, 2008. **230**(1): p. 23-32.
111. Hagens, A., et al., *Structure-activity relationship assessment of four perfluorinated chemicals using a prolonged zebrafish early life stage test*. Chemosphere, 2011. **82**(5): p. 764-72.
112. Panter, G.H., et al., *Development of chronic tests for endocrine active chemicals. Part 1. An extended fish early-life stage test for oestrogenic active chemicals in the fathead minnow (Pimephales promelas)*. Aquat Toxicol, 2006. **77**(3): p. 279-90.
113. Urushitani, H., et al., *Medaka (Oryzias latipes) for use in evaluating developmental effects of endocrine active chemicals with special reference to gonadal intersex (testis-ova)*. Environ Sci, 2007. **14**(5): p. 211-33.
114. Andersen, L., et al., *Effects of exposure to 17alpha-ethinylestradiol during early development on sexual differentiation and induction of vitellogenin in zebrafish (Danio rerio)*. Comp Biochem Physiol C Toxicol Pharmacol, 2003. **134**(3): p. 365-74.
115. Ankley, G.T., et al., *Description and evaluation of a short-term reproduction test with the fathead minnow (Pimephales promelas)*. Environ Toxicol Chem, 2001. **20**(6): p. 1276-90.
116. Sali, K.S., et al., *Neurodevelopmental low-dose bisphenol A exposure leads to early life-stage hyperactivity and learning deficits in adult zebrafish*. Toxicology, 2012.
117. Colman, J.R., et al., *Effects of the synthetic estrogen, 17alpha-ethinylestradiol, on aggression and courtship behavior in male zebrafish (Danio rerio)*. Aquat Toxicol, 2009. **91**(4): p. 346-54.
118. Ankley, G.T., et al., *Evaluation of the aromatase inhibitor fadrozole in a short-term reproduction assay with the fathead minnow (Pimephales promelas)*. Toxicol Sci, 2002. **67**(1): p. 121-30.
119. Dang, Z., et al., *Endpoint sensitivity in fish endocrine disruption assays: regulatory implications*. Toxicol Lett, 2011. **202**(1): p. 36-46.
120. Bringolf, R.B., J.B. Belden, and R.C. Summerfelt, *Effects of atrazine on fathead minnow in a short-term reproduction assay*. Environ Toxicol Chem, 2004. **23**(4): p. 1019-25.
121. Mouriec, K., et al., *Early regulation of brain aromatase (cyp19a1b) by estrogen receptors during zebrafish development*. Dev Dyn, 2009. **238**(10): p. 2641-51.
122. Sassi-Messai, S., et al., *The phytoestrogen genistein affects zebrafish development through two different pathways*. PLoS One, 2009. **4**(3): p. e4935.
123. Goulet, B.N. and A. Hontela, *Toxicity of cadmium, endosulfan, and atrazine in adrenal steroidogenic cells of two amphibian species, Xenopus laevis and Rana catesbeiana*. Environ Toxicol Chem, 2003. **22**(9): p. 2106-13.
124. Lutz, I., et al., *Development, standardization and refinement of procedures for evaluating effects of endocrine active compounds on development and sexual differentiation of Xenopus laevis*. Anal Bioanal Chem, 2008. **390**(8): p. 2031-48.
125. Kloas, W., et al., *Endocrine disruption in aquatic vertebrates*. Ann N Y Acad Sci, 2009. **1163**: p. 187-200.
126. Bates, J.H., M. Rincon, and C.G. Irvin, *Animal models of asthma*. Am J Physiol Lung Cell Mol Physiol, 2009. **297**(3): p. L401-10.
127. Hagiwara, H., et al., *Effects of alkylphenols on bone metabolism in vivo and in vitro*. Toxicol Lett, 2008. **181**(1): p. 13-8.
128. Dickerson, S.M., et al., *Endocrine disruption of brain sexual differentiation by developmental PCB exposure*. Endocrinology, 2011. **152**(2): p. 581-94.
129. Rubin, B.S., et al., *Evidence of altered brain sexual differentiation in mice exposed perinatally to low, environmentally relevant levels of bisphenol A*. Endocrinology, 2006. **147**(8): p. 3681-91.
130. Cao, J. and H.B. Patisaul, *Sexually dimorphic expression of hypothalamic estrogen receptors alpha and beta and Kiss1 in neonatal male and female rats*. J Comp Neurol, 2011. **519**(15): p. 2954-77.
131. Cabaton, N.J., et al., *Perinatal exposure to environmentally relevant levels of bisphenol A decreases fertility and fecundity in CD-1 mice*. Environ Health Perspect, 2011. **119**(4): p. 547-52.
132. McLachlan, J.A., et al., *Reduced fertility in female mice exposed transplacentally to diethylstilbestrol (DES)*. Fertil Steril, 1982. **38**: p. 364-71.
133. David, R.M., et al., *Chronic toxicity of di(2-ethylhexyl)phthalate in rats*. Toxicol Sci, 2000. **55**(2): p. 433-43.

134. Korkmaz, A., et al., *Vitamin C coadministration augments bisphenol A, nonylphenol, and octylphenol induced oxidative damage on kidney of rats*. Environ Toxicol, 2011. **26**(4): p. 325-37.
135. Jenkins, S., et al., *Oral exposure to bisphenol A increases dimethylbenzanthracene-induced mammary cancer in rats*. Environ Health Perspect, 2009. **117**(6): p. 910-5.
136. Lamartiniere, C.A., et al., *Exposure to the Endocrine Disruptor Bisphenol A Alters Susceptibility for Mammary Cancer*. Horm Mol Biol Clin Investig, 2011. **5**(2): p. 45-52.
137. Murray, T.J., et al., *Induction of mammary gland ductal hyperplasias and carcinoma in situ following fetal bisphenol A exposure*. Reprod Toxicol, 2007. **23**(3): p. 383-90.
138. Durando, M., et al., *Prenatal bisphenol A exposure induces preneoplastic lesions in the mammary gland in Wistar rats*. Environ Health Perspect, 2007. **115**: p. 80-86.
139. Palanza, P., et al., *Exposure to a low dose of bisphenol A during fetal life or in adulthood alters maternal behavior in mice*. Environ Health Perspect, 2002. **110**(Suppl 3): p. 415-422.
140. Hariri, N. and L. Thibault, *High-fat diet-induced obesity in animal models*. Nutr Res Rev, 2010. **23**(2): p. 270-99.
141. Varga, O., et al., *Contribution of animal models to the understanding of the metabolic syndrome: a systematic overview*. Obes Rev, 2010. **11**(11): p. 792-807.
142. Ho, S.M., et al., *Developmental exposure to estradiol and bisphenol A increases susceptibility to prostate carcinogenesis and epigenetically regulates phosphodiesterase type 4 variant 4*. Cancer Research, 2006. **66**(11): p. 5624-32.
143. Prins, G.S., et al., *Serum bisphenol A pharmacokinetics and prostate neoplastic responses following oral and subcutaneous exposures in neonatal Sprague-Dawley rats*. Reprod Toxicol, 2011. **31**(1): p. 1-9.
144. Cox, K.H. and E.F. Rissman, *Sex differences in juvenile mouse social behavior are influenced by sex chromosomes and social context*. Genes Brain Behav, 2011. **10**(4): p. 465-72.
145. Kokras, N., et al., *Behavioral sexual dimorphism in models of anxiety and depression due to changes in HPA axis activity*. Neuropharmacology, 2012. **62**(1): p. 436-45.
146. Turgeon, S.M., et al., *The effects of phencyclidine (PCP) on anxiety-like behavior in the elevated plus maze and the light-dark exploration test are age dependent, sexually dimorphic, and task dependent*. Pharmacol Biochem Behav, 2011. **100**(1): p. 191-8.
147. Wolstenholme, J.T., et al., *Gestational exposure to low dose bisphenol a alters social behavior in juvenile mice*. PLoS One, 2011. **6**(9): p. e25448.
148. Moggs, J.G., *Molecular responses to xenoestrogens: mechanistic insights from toxicogenomics*. Toxicology, 2005. **213**(3): p. 177-93.
149. Iguchi, T., H. Watanabe, and Y. Katsu, *Toxicogenomics and ecotoxicogenomics for studying endocrine disruption and basic biology*. Gen Comp Endocrinol, 2007. **153**(1-3): p. 25-9.
150. Zama, A.M. and M. Uzumcu, *Epigenetic effects of endocrine-disrupting chemicals on female reproduction: an ovarian perspective*. Front Neuroendocrinol, 2010. **31**(4): p. 420-39.
151. Sacan, M.T., M. Ozkul, and S.S. Erdem, *Physico-chemical properties of PCDD/PCDFs and phthalate esters*. SAR QSAR Environ Res, 2005. **16**(5): p. 443-59.
152. Nose, T. and Y. Shimohigashi, *A docking modelling rationally predicts strong binding of bisphenol A to estrogen-related receptor gamma*. Protein Pept Lett, 2008. **15**(3): p. 290-6.
153. Wu, B., et al., *Computational studies of interactions between endocrine disrupting chemicals and androgen receptor of different vertebrate species*. Chemosphere, 2010. **80**(5): p. 535-41.
154. Gumy, C., et al., *Dibutyltin disrupts glucocorticoid receptor function and impairs glucocorticoid-induced suppression of cytokine production*. PLoS ONE, 2008. **3**(10): p. e3545.
155. Hu, J.Y. and T. Aizawa, *Quantitative structure-activity relationships for estrogen receptor binding affinity of phenolic chemicals*. Water Res, 2003. **37**(6): p. 1213-22.
156. Basu Baul, T.S., et al., *Synthesis, crystal structures, cytotoxicity and qualitative structure-activity relationship (QSAR) of cis-bis[5-[(E)-2-(aryl)-1-diazenyl]quinolinolato]di-n-butyltin(IV) complexes, (n)Bu2Sn(L)2*. J Inorg Biochem, 2008. **102**(9): p. 1719-30.
157. National Toxicology Program. *High throughput screening initiative*. 2011 [cited 2011 Oct 17 2011]; Available from: <http://ntp.niehs.nih.gov/?objectid=05F80E15-F1F6-975E-77DDEDBDF3B941CD#6>.
158. Kanai, H., et al., *Cell-transforming activity and estrogenicity of bisphenol-A and 4 of its analogs in mammalian cells*. Int J Cancer, 2001. **93**(1): p. 20-5.
159. Masas, M., et al., *Estrogen-like properties of fluorotelomer alcohols as revealed by mcf-7 breast cancer cell proliferation*. Environ Health Perspect, 2006. **114**(1): p. 100-5.
160. Okubo, T., et al., *Estimation of estrogenic and anti-estrogenic activities of some phthalate diesters and monoesters by MCF-7 cell proliferation assay in vitro*. Biol Pharm Bull, 2003. **26**(8): p. 1219-24.
161. Wetherill, Y.B., et al., *The xenoestrogen Bisphenol A induces inappropriate androgen receptor activation and mitogenesis in prostatic adenocarcinoma cells*. Molecular Cancer Therapeutics, 2002. **1**: p. 515-524.

162. Yamabe, Y., et al., *Enhancement of androgen-dependent transcription and cell proliferation by tributyltin and triphenyltin in human prostate cancer cells*. *Toxicol Appl Pharmacol*, 2000. **169**(2): p. 177-84.
163. Sargis, R.M., et al., *Environmental endocrine disruptors promote adipogenesis in the 3T3-L1 cell line through glucocorticoid receptor activation*. *Obesity (Silver Spring)*, 2010. **18**(7): p. 1283-8.
164. Ghisari, M. and E.C. Bonefeld-Jorgensen, *Impact of environmental chemicals on the thyroid hormone function in pituitary rat GH3 cells*. *Mol Cell Endocrinol*, 2005. **244**(1-2): p. 31-41.
165. Ghisari, M. and E.C. Bonefeld-Jorgensen, *Effects of plasticizers and their mixtures on estrogen receptor and thyroid hormone functions*. *Toxicol Lett*, 2009. **189**(1): p. 67-77.
166. Zeng, Z., et al., *Development of estrogen-responsive transgenic medaka for environmental monitoring of endocrine disruptors*. *Environ Sci Technol*, 2005. **39**(22): p. 9001-8.
167. Kurauchi, K., et al., *In vivo visual reporter system for detection of estrogen-like substances by transgenic medaka*. *Environ Sci Technol*, 2005. **39**(8): p. 2762-8.
168. Tabata, A., et al., *The effect of bisphenol A and chlorinated derivatives of bisphenol A on the level of serum vitellogenin in Japanese medaka (Oryzias latipes)*. *Water Sci Technol*, 2004. **50**(5): p. 125-32.
169. Tillitt, D.E., et al., *Atrazine reduces reproduction in fathead minnow (Pimephales promelas)*. *Aquat Toxicol*. **99**(2): p. 149-59.
170. Ji, K., et al., *Toxicity of perfluorooctane sulfonic acid and perfluorooctanoic acid on freshwater macroinvertebrates (Daphnia magna and Moina macrocopa) and fish (Oryzias latipes)*. *Environ Toxicol Chem*, 2008. **27**(10): p. 2159-68.
171. Kim, E.J., J.W. Kim, and S.K. Lee, *Inhibition of oocyte development in Japanese medaka (Oryzias latipes) exposed to di-2-ethylhexyl phthalate*. *Environ Int*, 2002. **28**(5): p. 359-65.
172. Zhang, Z., et al., *Reproductive inhibition and transgenerational toxicity of triphenyltin on medaka (Oryzias latipes) at environmentally relevant levels*. *Environ Sci Technol*, 2008. **42**(21): p. 8133-9.
173. Iwamuro, S., et al., *Teratogenic and anti-metamorphic effects of bisphenol A on embryonic and larval Xenopus laevis*. *Gen Comp Endocrinol*, 2003. **133**(2): p. 189-98.
174. Shen, O., et al., *Thyroid disruption by Di-n-butyl phthalate (DBP) and mono-n-butyl phthalate (MBP) in Xenopus laevis*. *PLoS ONE*, 2011. **6**(4): p. e19159.
175. Tietge, J.E., et al., *Metamorphic inhibition of Xenopus laevis by sodium perchlorate: effects on development and thyroid histology*. *Environ Toxicol Chem*, 2005. **24**(4): p. 926-33.
176. Levy, G., et al., *Bisphenol A induces feminization in Xenopus laevis tadpoles*. *Environ Res*, 2004. **94**(1): p. 102-11.
177. Hayes, T.B., et al., *Hermaphroditic, demasculinized frogs after exposure to the herbicide atrazine at low ecologically relevant doses*. *Proc Natl Acad Sci U S A*, 2002. **99**(8): p. 5476-80.
178. Lee, S.K. and D.N. Veeramachaneni, *Subchronic exposure to low concentrations of di-n-butyl phthalate disrupts spermatogenesis in Xenopus laevis frogs*. *Toxicol Sci*, 2005. **84**(2): p. 394-407.
179. Goleman, W.L., J.A. Carr, and T.A. Anderson, *Environmentally relevant concentrations of ammonium perchlorate inhibit thyroid function and alter sex ratios in developing Xenopus laevis*. *Environ Toxicol Chem*, 2002. **21**(3): p. 590-7.
180. Midoro-Horiuti, T., et al., *Maternal bisphenol a exposure promotes the development of experimental asthma in mouse pups*. *Environ Health Perspect*, 2011. **118**(2): p. 273-7.
181. Takagi, H., et al., *Impact of maternal dietary exposure to endocrine-acting chemicals on progesterone receptor expression in microdissected hypothalamic medial preoptic areas of rat offspring*. *Toxicol Appl Pharmacol*, 2005. **208**(2): p. 127-36.
182. Hobler, C., et al., *Sex-dependent aromatase activity in rat offspring after pre- and postnatal exposure to triphenyltin chloride*. *Toxicology*, 2010. **276**(3): p. 198-205.
183. Ueda, M., et al., *Possible enhancing effects of atrazine on growth of 7,12-dimethylbenz(a) anthracene-induced mammary tumors in ovariectomized Sprague-Dawley rats*. *Cancer Sci*, 2005. **96**(1): p. 19-25.
184. Rayner, J.L., R.R. Enoch, and S.E. Fenton, *Adverse effects of prenatal exposure to atrazine during a critical period of mammary gland growth*. *Toxicol Sci*, 2005. **87**: p. 255-266.
185. White, S.S., et al., *Gestational and chronic low-dose PFOA exposures and mammary gland growth and differentiation in three generations of CD-1 mice*. *Environ Health Perspect*, 2011. **119**(8): p. 1070-6.
186. Zhao, Y., et al., *Perfluorooctanoic acid effects on steroid hormone and growth factor levels mediate stimulation of peripubertal mammary gland development in C57BL/6 mice*. *Toxicol Sci*, 2010. **115**(1): p. 214-24.
187. Moral, R., et al., *In utero exposure to butyl benzyl phthalate induces modifications in the morphology and the gene expression profile of the mammary gland: an experimental study in rats*. *Environ Health*, 2011. **10**(1): p. 5.



188. Baroncelli, S., D. Karrer, and P.G. Turillazzi, *Oral bis(tri-n-butyltin) oxide in pregnant mice. I. Potential influence of maternal behavior on postnatal mortality.* J Toxicol Environ Health, 1995. **46**(3): p. 355-67.
189. Alonso-Magdalena, P., et al., *Bisphenol A exposure during pregnancy disrupts glucose homeostasis in mothers and adult male offspring.* Environ Health Perspect, 2010. **118**(9): p. 1243-50.
190. Ryan, K.K., et al., *Perinatal exposure to bisphenol-a and the development of metabolic syndrome in CD-1 mice.* Endocrinology, 2010. **151**(6): p. 2603-12.
191. Lim, S., et al., *Chronic exposure to the herbicide, atrazine, causes mitochondrial dysfunction and insulin resistance.* PLoS ONE, 2009. **4**(4): p. e5186.
192. Boberg, J., et al., *Impact of diisobutyl phthalate and other PPAR agonists on steroidogenesis and plasma insulin and leptin levels in fetal rats.* Toxicology, 2008. **250**(2-3): p. 75-81.
193. Prins, G.S., et al., *Developmental estrogen exposures predispose to prostate carcinogenesis with aging.* Reprod Toxicol, 2007. **23**(3): p. 374-82.
194. Somm, E., et al., *Perinatal exposure to bisphenol a alters early adipogenesis in the rat.* Environ Health Perspect, 2009. **117**(10): p. 1549-55.
195. Victor-Costa, A.B., et al., *Changes in testicular morphology and steroidogenesis in adult rats exposed to Atrazine.* Reprod Toxicol, 2010. **29**(3): p. 323-31.
196. Shi, Z., et al., *Chronic exposure to perfluorododecanoic acid disrupts testicular steroidogenesis and the expression of related genes in male rats.* Toxicol Lett, 2009. **188**(3): p. 192-200.
197. Moral, R., et al., *The plasticizer butyl benzyl phthalate induces genomic changes in rat mammary gland after neonatal/prepubertal exposure.* BMC Genomics, 2007. **8**: p. 453.
198. Kim, S.K., et al., *Inhibitory effect of tributyltin on expression of steroidogenic enzymes in mouse testis.* Int J Toxicol, 2008. **27**(2): p. 175-82.
199. McDougal, J.N., et al., *The effects of perchlorate on thyroidal gene expression are different from the effects of iodide deficiency.* J Toxicol Environ Health A, 2011. **74**(14): p. 917-26.
